# Supplementary material for: Computational Identification and Evaluation of Curcumin Derivatives as Potential Inhibitors of PPP2R5B to Enhance Insulin Sensitivity
Source: Research Square preprint supplement (doi:10.21203/rs.3.rs-7415440/v1), 2025-10-23
Supplement: Supplementary file 1 [file 2f1aef68edb8e6eed7d9d76a.pdf]

## MD SIMULATION ANALYSIS FOR COMPLEXES 2-6

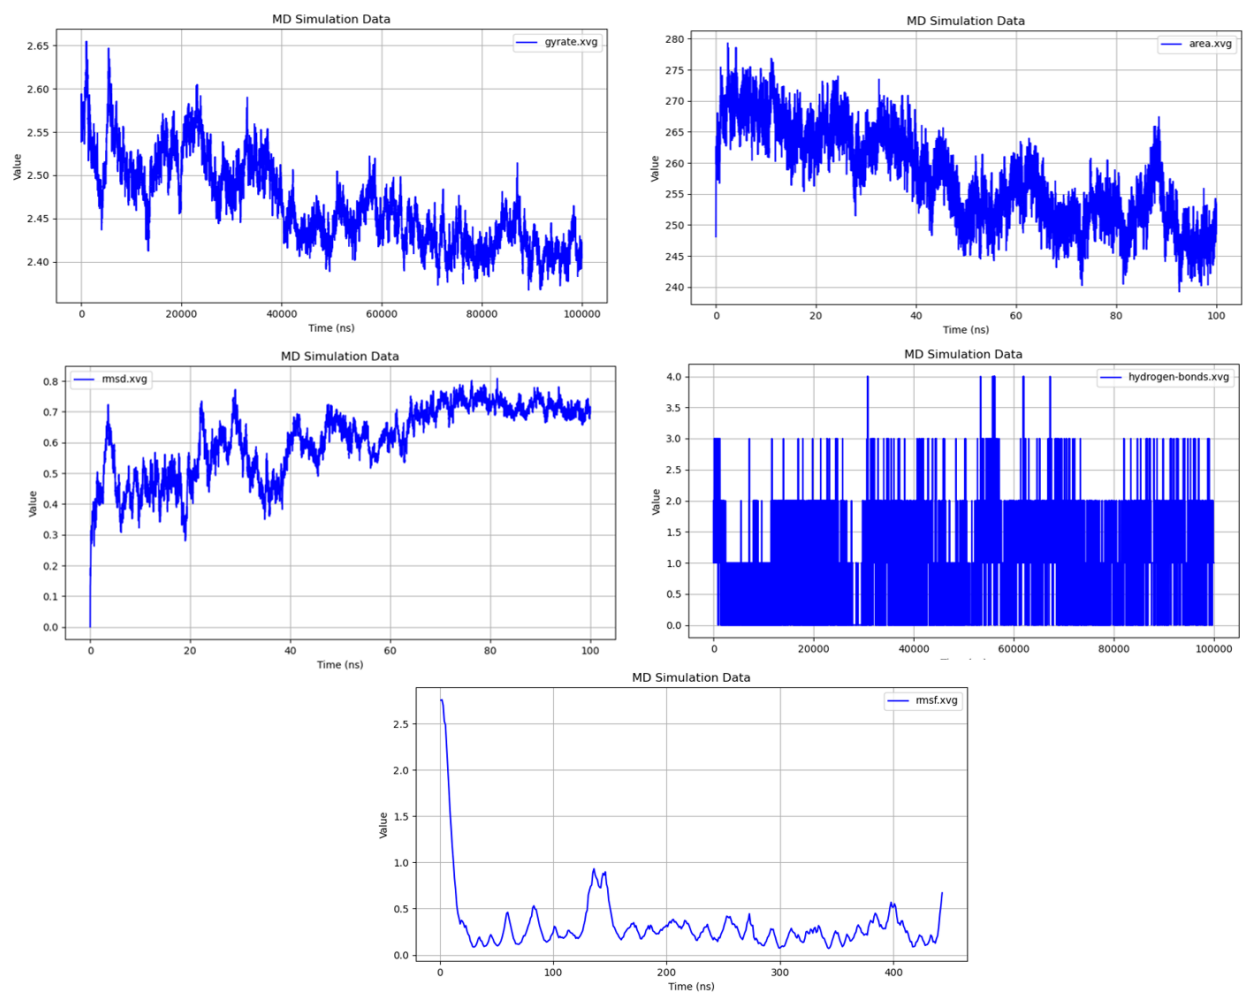

**Figure 1** MD Simulation analysis of the 2nd top-ranked complex **perfluoro\_curcumin (complex 2\_)** with its receptor. The analysis indicates a stable, productive binding pose.

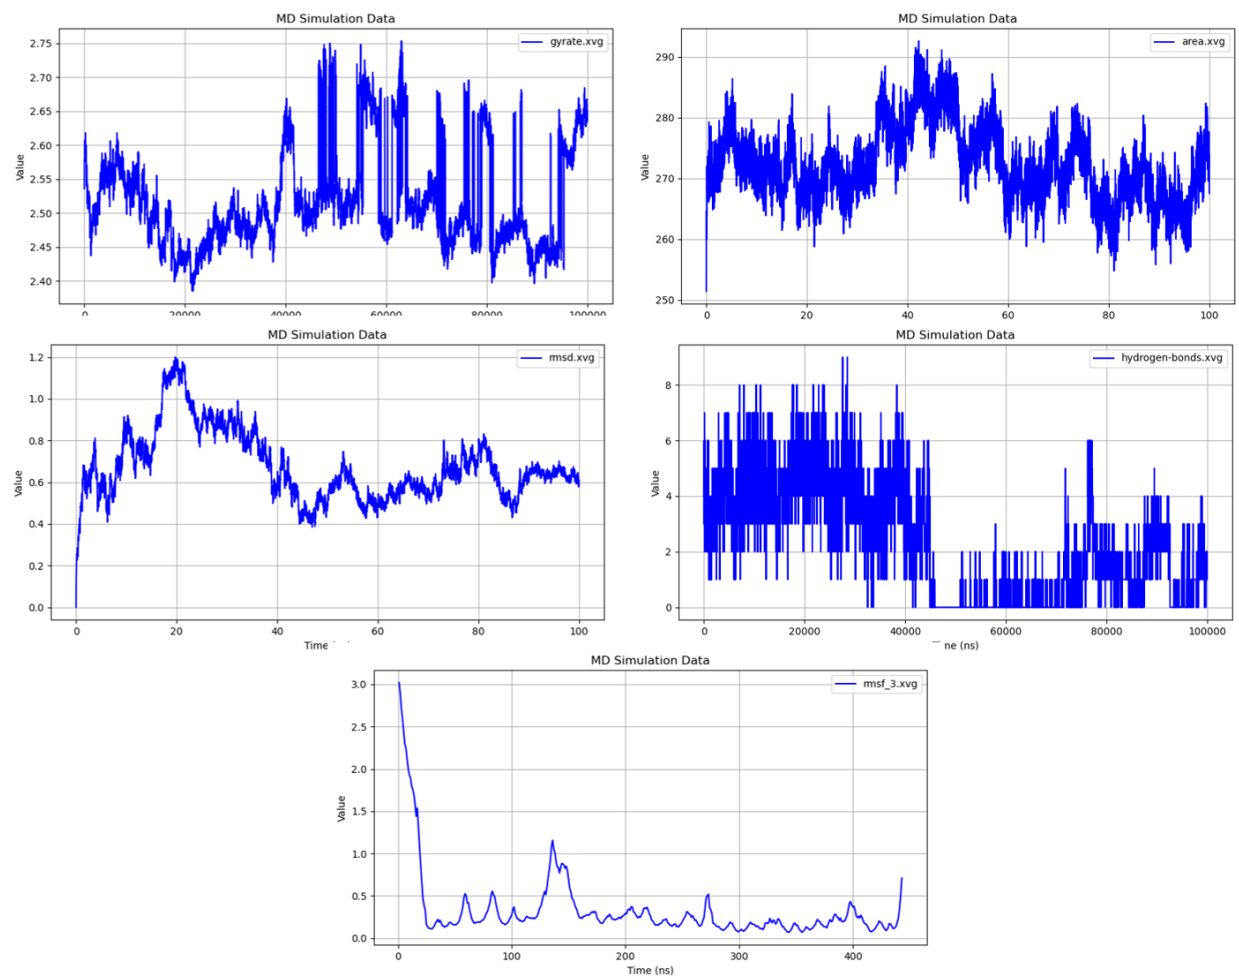

**Figure 2** MD Simulation analysis of the 3rd top-ranked complex **curcumin\_4'\_O\_beta\_D\_gentiobioside (complex 3\_)** with its receptor.

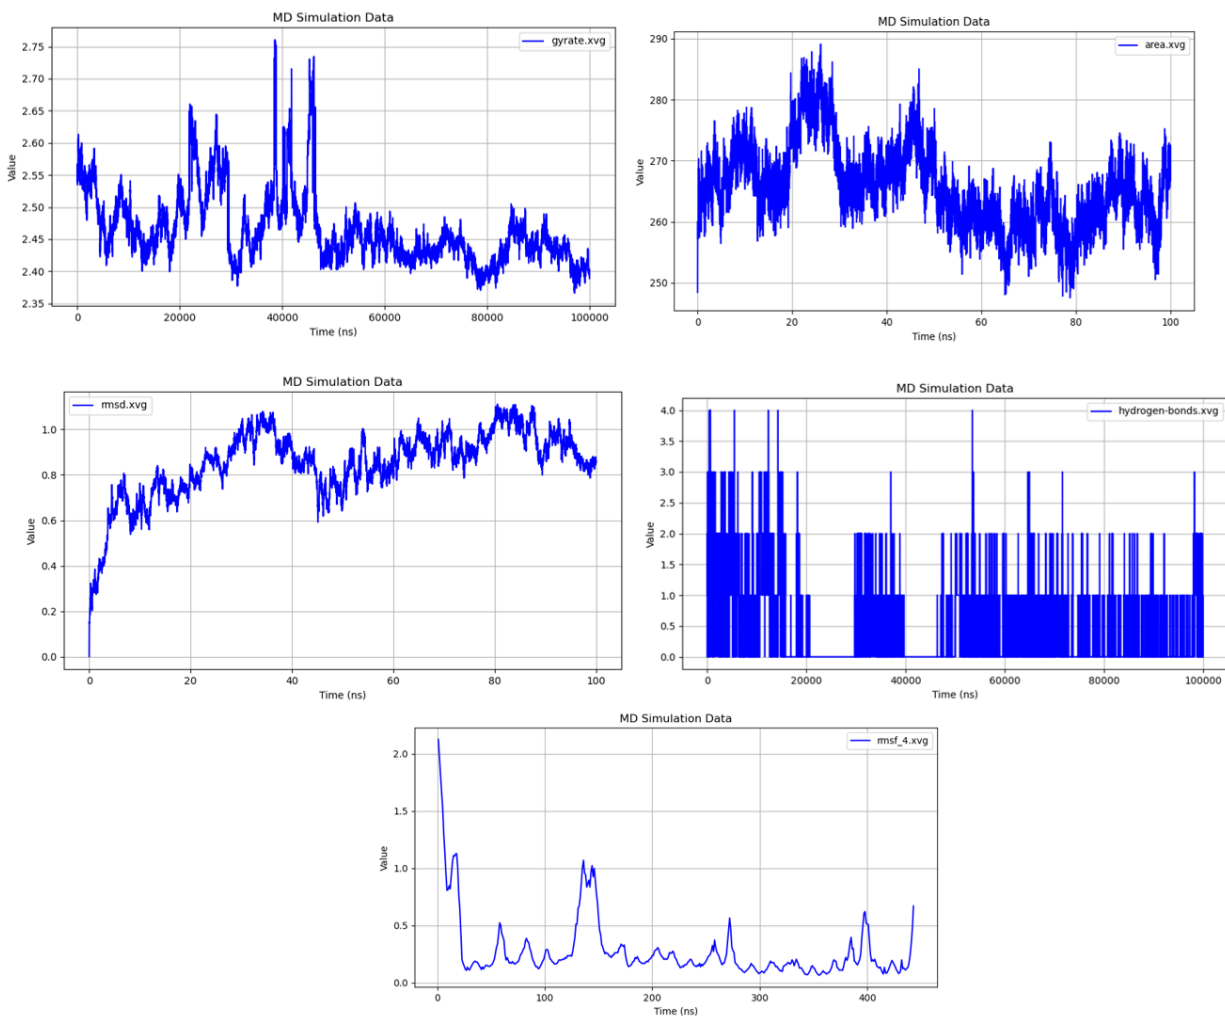

**Figure 3** MD Simulation analysis of the 4th ranked complex **4-(4-Hydroxy-3-methoxybenzylidene)-1,7-bis(4-hydroxy-3-methoxyphenyl)hepta-1,6-diene-3,5-dione (complex 4<sub>1</sub>)** with its receptor.

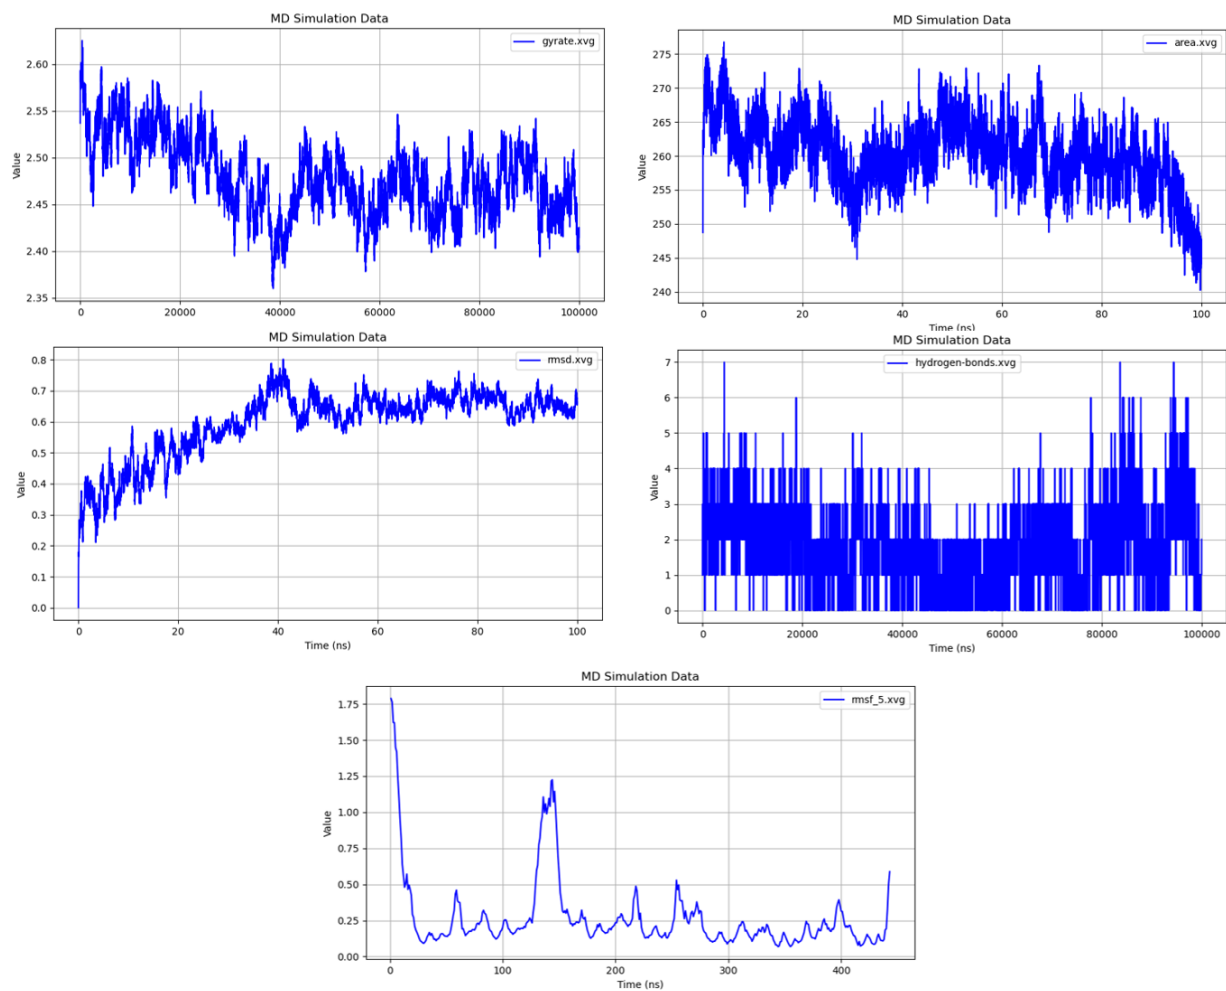

**Figure 4** MD Simulation analysis of the 5th ranked complex **Curcumin\_diglucoside (complex 5\_)** with its receptor.

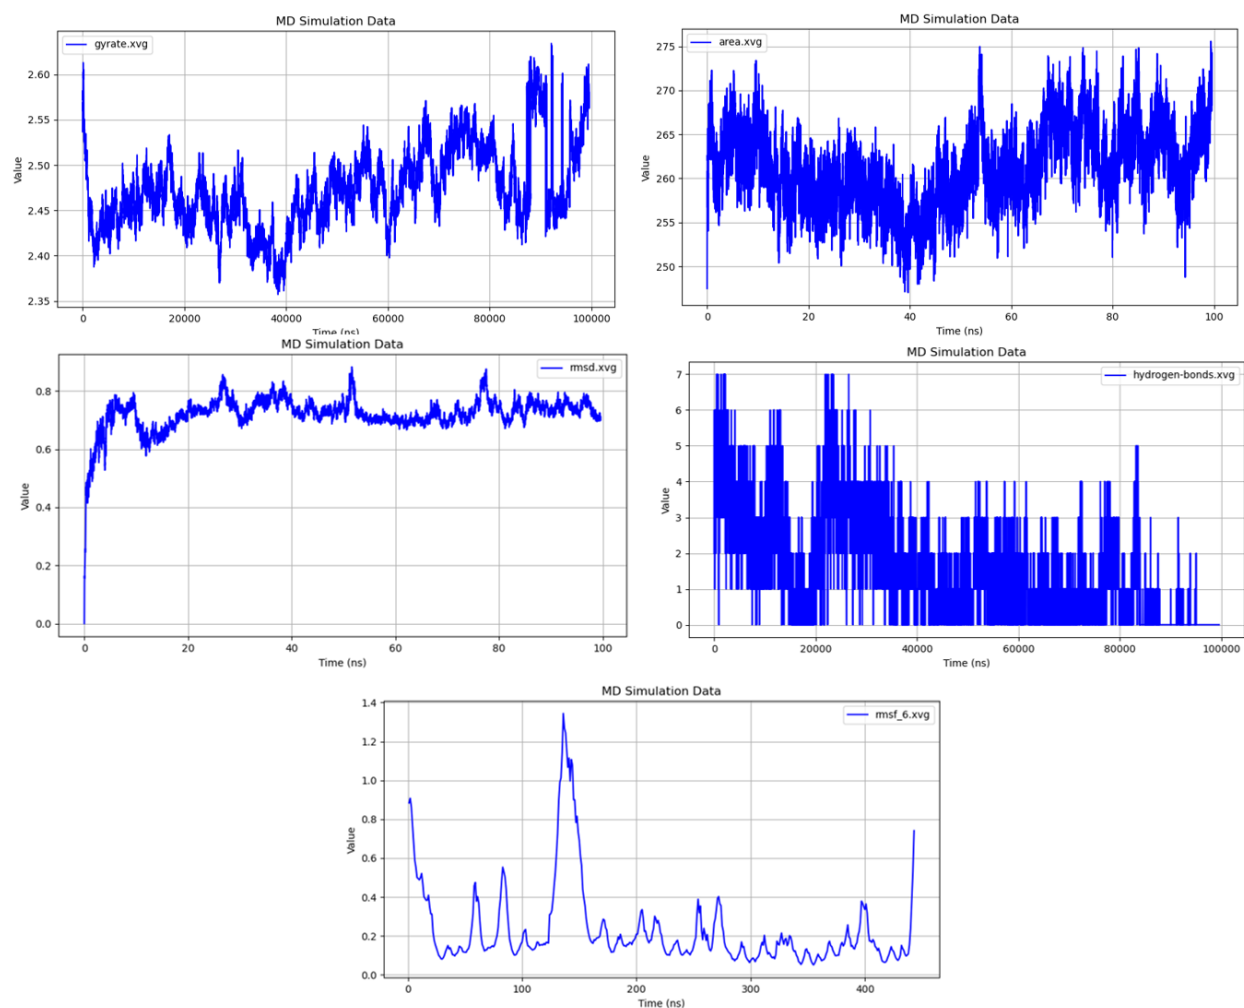

**Figure 5** MD Simulation analysis of the 6th ranked complex **Curcumin\_b\_D\_Glucuronide\_Sodium\_Salt (complex 6\_)** with its receptor.
