# Supplementary material for: Computational Identification and Evaluation of Curcumin Derivatives as Potential Inhibitors of PPP2R5B to Enhance Insulin Sensitivity
Source: Research Square preprint supplement (doi:10.21203/rs.3.rs-7415440/v1), 2025-10-23
Supplement: Supplementary file 1 [file 2112867b1e514048e7a6b34e.xlsx]

## Sheet: Curcumin analogues (S1)
Ligands	Binding Energy
Curcumin_Bicyclopentadione	-9.2
perfluoro_curcumin	-8.9
curcumin_4'_O_beta_D_gentiobioside	-8.4
4-(4-Hydroxy-3-methoxybenzylidene)-1,7-bis(4-hydroxy-3-methoxyphenyl)hepta-1,6-diene-3,5-dione	-8.3
Curcumin_diglucoside	-8.2
Curcumin_b_D_Glucuronide_Sodium_Salt	-8
Curcumin_monoglucoside	-8
Curcumin_monoglucuronide	-8
Di_valinoyl_curcumin	-8
Curcumin_glucuronide_sulfate	-7.9
Difluorinated_Curcumin	-7.9
Ferrocenyl_curcumin	-7.8
Isoxazole_curcumin	-7.7
Phenylaminocarbonyl_curcumin	-7.7
di_O_nicotinoyl_curcumin	-7.5
N_4_Fluorophenylpyrazole_Curcumin	-7.5
Hydrochloride_curcumin	-7.4
4-Hydroxy-3-[4-hydroxy-3-(trideuteriomethoxy)phenoxy]-1-[4-hydroxy-3-(trideuteriomethoxy)phenyl]-1,3,3a,6a-tetrahydrocyclopenta[c]furan-6-one	-7.3
Monovalinoyl_curcumin	-7.3
glucosyl_curcumin	-7.2
Demethoxycurcumin	-7.1
Didemethyl_Curcumin_d6	-7.1
(1E,4Z,6E)-5-hydroxy-1-(4-hydroxy-3-methoxyphenyl)-7-[3-methoxy-4-[3,4,5-trihydroxy-6-(hydroxymethyl)oxan-2-yl]oxyphenyl]hepta-1,4,6-trien-3-one	-7
4_benzylidene_Curcumin	-7
Curcumin_Beta_D_Glucuronide_d3_Sodium_Salt	-7
Curcumin_diglucoside_d6	-7
FD_&_C_Yellow_No_6	-7
Sodium_Curcumin_beta_D_Glucuronide_d3	-7
1,7-Bis(4-hydroxy-3-methoxyphenyl)-1,6_heptadiene_3,5_di_one_disodium_salt	-6.9
Di_O_2_Thienoyl_curcumin	-6.9
di_O_picolinoyl_curcumin	-6.9
Ethyl_Curcumin	-6.9
(1E,4E)-1,5-Bis(2-methoxyphenyl)penta-1,4-dien-3-one	-6.8
Curcumin_oxide	-6.8
Mono_Propargyl_Curcumin	-6.7
Curcumin_pyrazole	-6.6
curcumin	-6.5
Curcumin_bis_methylsuccinate	-6.5
Didemethyl_Curcumin	-6.5
Difluorobenzylidene_curcumin	-6.5
N_3_Nitrophenylpyrazole_Curcumin	-6.5
Tetrahydrobismethoxy_curcumin	-6.5
3_4_Difluorobenzylidene_curcumin	-6.4
4-(2-(5-(4-Hydroxy-3-methoxystyryl)isoxazol-3-yl)vinyl)-2-methoxyphenol	-6.4
1_7_Bis_4_hydroxyphenyl_hepta_1_6_diene_3_5_di_one	-6.3
2E_Demethoxy_Curcumin_d7	-6.3
Tetrahydrocurcumin	-6.3
Curcumin_dihydrate	-6.2
Tetrahydro_Curcumin_d6	-6.2
US9187406	-6.2
(1E,6E)-1,7-bis(4-allyloxy-3-methoxy-phenyl)hepta-1,6-diene-3,5-dione	-6
Bisdemethoxycurcumin	-6
Cnb_001	-6
Curcumin_sulfate_triethylamine	-6
mono_methacryloyl_curcumin	-6
Di_acetylcurcumin	-5.9
18FP_Curcumin	-5.8
Curcumin_glucuronide	-5.8
diethylamino_curcumin	-5.8
Disalicyloyl_curcumin	-5.8
Allyl_curcumin	-5.7
Curcumin_D6	-5.7
N_4_Methoxyphenylpyrazole_Curcumin	-5.7
Curcumin_Glutarate	-5.6
Di_fluoro_curcumin	-5.6
Monodemethylcurcumin	-5.6
Curcumin_Acetate	-5.5
Hydroxy_curcumin	-5.5
Monoglycinoyl_curcumin	-5.5
Octahydrocurcumin	-5.5
thiadiazolyl_curcumin	-5.5
Carbonyl_curcumin	-5.4
Curcumin_Lysinate	-5.4
Tetrahydro_methoxy_curcumin	-5.4
Dimethoxycurcumin	-5.3
Mono_carbonyl_curcumin	-5.3
cis_Curcumin	-5.2
Curcumin_dioxime	-5.2
curcumin_semicarbazone	-5.2
Curcumin_sulfate	-5.2
Dicarbonyl_curcumin	-5.1
13C_Curcumin	-5
1_4_Hydroxy_3_methoxyphenyl_7_4_hydroxyphenyl_1_6_heptadiene_3_5_di_one	-5
Hexahydrocurcumin	-4.8
Keto_curcumin	-4.8

## Sheet: ADMET profile (S2)
Compound	BCRP Inhibitor	CYP3A4 Inhibitor	CYP3A4 Substrate	CYP2D6 Inhibitor	CYP2D6 Substrate	AMES Mutagenesis	Carcinogenicity	hERG Blocker	DILI (Typeâ€¯I)	DILI (Typeâ€¯II)
Curcumin Bicyclopentadione CID 10862269	Non-Inhibitor (High Confidence)	Non-Inhibitor (High Confidence)	Non-Substrate (Low Confidence)	Non-Inhibitor (High Confidence)	Non-Substrate (Medium Confidence)	Safe (Medium Confidence)	Safe (High Confidence)	Safe (High Confidence)	Safe (Medium Confidence)	Safe (Low Confidence)
perfluoro curcumin CID 129863789	Non-Inhibitor (High Confidence)	Non-Inhibitor (High Confidence)	Substrate (High Confidence)	Inhibitor (High Confidence)	Non-Substrate (High Confidence)	Safe (High Confidence)	Safe (High Confidence)	Safe (High Confidence)	Toxic (Medium Confidence)	Toxic (High Confidence)
curcumin 4'-O-beta-D-gentiobioside	Non-Inhibitor (High Confidence)	Non-Inhibitor (High Confidence)	Substrate (Medium Confidence)	Non-Inhibitor (High Confidence)	Non-Substrate (High Confidence)	Safe (High Confidence)	Safe (High Confidence)	Safe (High Confidence)	Safe (Medium Confidence)	Safe (Low Confidence)
4-(4-Hydroxy-3-methoxybenzylidene)-1,7-bis(4-hydroxy-3-methoxyphenyl)hepta-1,6-diene-3,5-dione	Non-Inhibitor (High Confidence)	Non-Inhibitor (High Confidence)	Substrate (Medium Confidence)	Non-Inhibitor (High Confidence)	Non-Substrate (Medium Confidence)	Safe (High Confidence)	Safe (High Confidence)	Safe (High Confidence)	Safe (High Confidence)	Safe (Low Confidence)
Curcumin diglucoside	Non-Inhibitor (High Confidence)	Non-Inhibitor (High Confidence)	Substrate (Medium Confidence)	Non-Inhibitor (High Confidence)	Non-Substrate (High Confidence)	Safe (High Confidence)	Safe (High Confidence)	Safe (High Confidence)	Safe (Low Confidence)	Safe (Medium Confidence)
Curcumin b D Glucuronide Sodium Salt CID 71315012	Non-Inhibitor (High Confidence)	Non-Inhibitor (High Confidence)	Substrate (Low Confidence)	Non-Inhibitor (High Confidence)	Non-Substrate (Medium Confidence)	Safe (High Confidence)	Safe (High Confidence)	Safe (High Confidence)	Safe (Medium Confidence)	Safe (Low Confidence)
